# Supplementary material for: The IgA in milk induced by SARS-CoV-2 infection is comprised of mainly secretory antibody that is neutralizing and highly durable over time
Source: PubMed Central journal article supplement (PMC8906612; doi:10.1371/journal.pone.0249723), 2022-03-09
Supplement: pone.0249723.s001.pdf [file pone.0249723.s001.pdf]

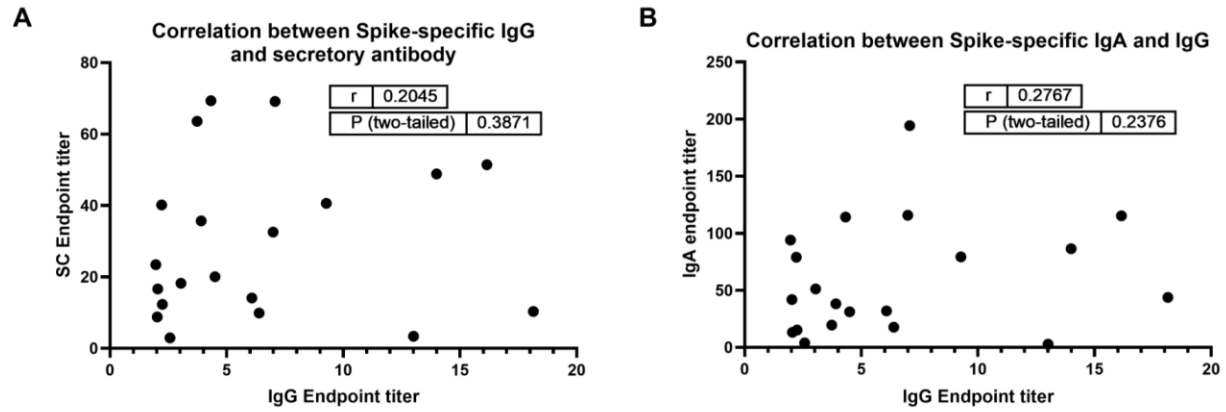

**S1 Fig 1. No correlation was found between Spike-specific milk IgG and IgA or IgG and secretory antibody titers.** (A) Secretory Ab versus IgG. (B) IgA versus IgG. Endpoint titers were used in 2-tailed Spearman correlation tests. SC: secretory component.
